# Supplementary material for: Impaired tumor growth and angiogenesis in mice heterozygous for Vegfr2 (Flk1)
Source: PubMed Central journal article supplement (PMC6170482; doi:10.1038/s41598-018-33037-2), 2018-10-03

## **Impaired tumor growth and angiogenesis in mice heterozygous for *Vegfr2 (Flk1)***

Sunday S. Oladipupo<sup>ac,\*</sup>, Ashraf UI Kabir<sup>b</sup>, Craig Smith<sup>a</sup>, Kyunghee Choi<sup>bd</sup>, and David M. Ornitz<sup>a,\*</sup>

Departments of <sup>a</sup>Developmental Biology and <sup>b</sup>Pathology and Immunology, Washington University School of Medicine, St. Louis, MO 63110.

<sup>c</sup>Present Address: Bio-TDR, Lilly Research Laboratories, Eli Lilly and Company, Indianapolis, IN 46285.

<sup>d</sup>Graduate School of Biotechnology, Kyung Hee University, Yong In, South Korea.

\*Correspondence: oladipupo\_sunday\_s@lilly.com or dornitz@wustl.edu.

**Supplementary Fig. S1:** Target genes and respective Taqman probe product numbers

| <b><u>Gene</u></b> | <b><u>TaqMan® probe catalog #</u></b> |
|--------------------|---------------------------------------|
| <i>Tnfa</i>        | Mm00443260_g1                         |
| <i>Il-6</i>        | Mm00446190_m1                         |
| <i>Ptgs2</i>       | Mm00478374_m1                         |
| <i>Vegfr1</i>      | Mm00438980_m1                         |
| <i>Vegfr2</i>      | Mm01222421_m1                         |
| <i>Gapdh</i>       | Mm99999915_g1                         |

## SUPPLEMENTARY FIGURE LEGENDS

### **Supplementary Fig. S1. *Vegfr2* heterozygosity impairs melanoma tumor growth.**

B16F0 melanoma tumor 14 days post tumor cell inoculation showing a marked decrease in tumor weight in *Vegfr2*<sup>Cre/+</sup>, *Vegfr2*<sup>lacZ/+</sup>, and DCKO mice compared to controls wild type (WT), *Vegfr2*<sup>+/+</sup>; *Fgfr1*<sup>ff</sup>; *Fgfr2*<sup>ff</sup> (DFF) mice. Results are mean ± SEM. Mann-Whitney U test was used to analyze significance (\*\*\*) p<0.001) compared to control. Where mouse number is unstated, each symbol represents one mouse.

### **Supplementary Fig. S2. VEGFR2 and FGFRs protein levels in melanoma cells and tumors grown in control and DCKO mice.**

(a) Western blot analysis of B16F0 melanoma cells before and after injection into control and DCKO mice displayed efficient *Fgfr1* deletion as shown by minimal FGFR1 protein detection in tumors from DCKO mice compared to control mice and B16F0 cells. FGFR3 and VEGFR1 levels were similar in tumors from control and DCKO mice and FGFR3 was highly expressed in B16F0 cells. VEGFR2 was not detected in B16F0 melanoma cells and was reduced in tumors from DCKO mice (a, b), consistent with *Vegfr2* heterozygosity in these mice. VE-Cadherin levels were reduced in DCKO tumors compared to controls. Cropped gels are displayed.

### **Supplementary Fig. S3. *Vegfr2* heterozygosity impairs Lewis lung carcinoma**

**(LLM) tumor neovascularization.** (a, c) Immunofluorescence staining of LLC tumors 20 days post implantation showing a marked decrease in Desmin (a) or αSMA (c) in CD31+ areas in *Vegfr2*<sup>Cre/+</sup> compared to control wild type mice (n=3). (b, d) Quantitation of immunofluorescence staining in a, and c, showing Desmin<sup>+</sup>, CD31<sup>+</sup> area (b) and

$\alpha$ SMA<sup>+</sup>, CD31<sup>+</sup> area (d). Two-tailed Student's t-test was used to analyze significance (\*  $p < 0.05$ , \*\*  $p < 0.01$ ) compared to control. Scale bars, 100  $\mu$ m (left panels: a,c) or 4.0  $\mu$ m (right panels: a,c).

**Supplementary Fig. S4. *Vegfr2* is efficiently deleted in hematopoietic cells in *Vav-Cre; Vegfr2<sup>fl/fl</sup>* mice.** Genomic DNA PCR analysis of peripheral blood (a), CD31<sup>-</sup>CD45<sup>+</sup> sorted hematopoietic cells from lungs (b), and CD31<sup>+</sup>CD45<sup>-</sup> sorted endothelial cells from lungs (c) from 2 independent *Vav-Cre; Vegfr2<sup>fl/fl</sup>* and control (*Vegfr2<sup>fl/fl</sup>*) mice are shown. Note that a faint deleted *Vegfr2* band is observed in the endothelial cells of the *Vav-Cre; Vegfr2<sup>fl/fl</sup>* mice, which reflects that *Vav-Cre* targets a small number of endothelial cells during development. Cropped gels are displayed.

**Supplementary Fig. S5. *Vegfr1* and *Vegfr2* mRNA expression in control and DCKO mouse skin seven days post TPA challenge.** (a) *Vegfr1* mRNA levels were similarly induced in the skin of both control (Ctl) and DCKO mice. (b) *Vegfr2* mRNA levels were induced in the skin of both control and DCKO mice, but levels were lower in DCKO mice compared to induced control mice, consistent with *Vegfr2* heterozygosity. Results are mean  $\pm$  SEM. Mann-Whitney U test was used to analyze significance (\*\*  $p = 0.006$ ; \*\*\*  $p = 0.0002$ ; #  $p = 0.038$ ; ###  $p < 0.0001$ ) compared to control.

SI Figure 1

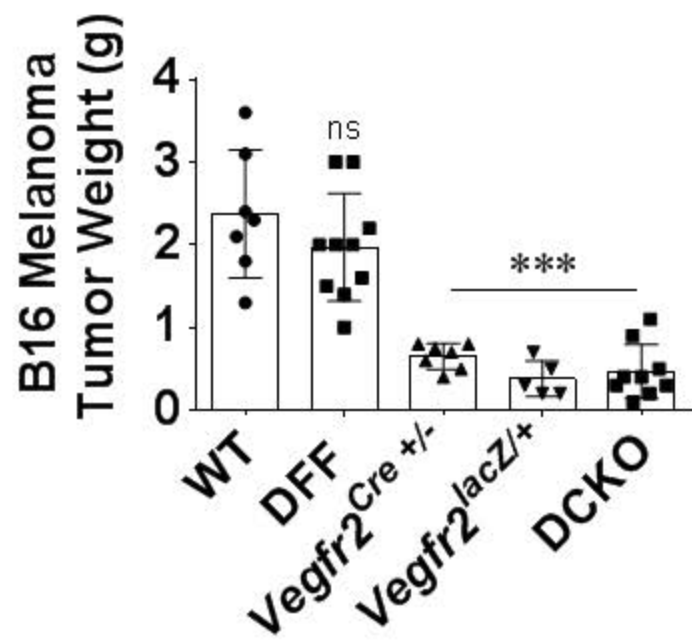

# SI Figure 2

## a

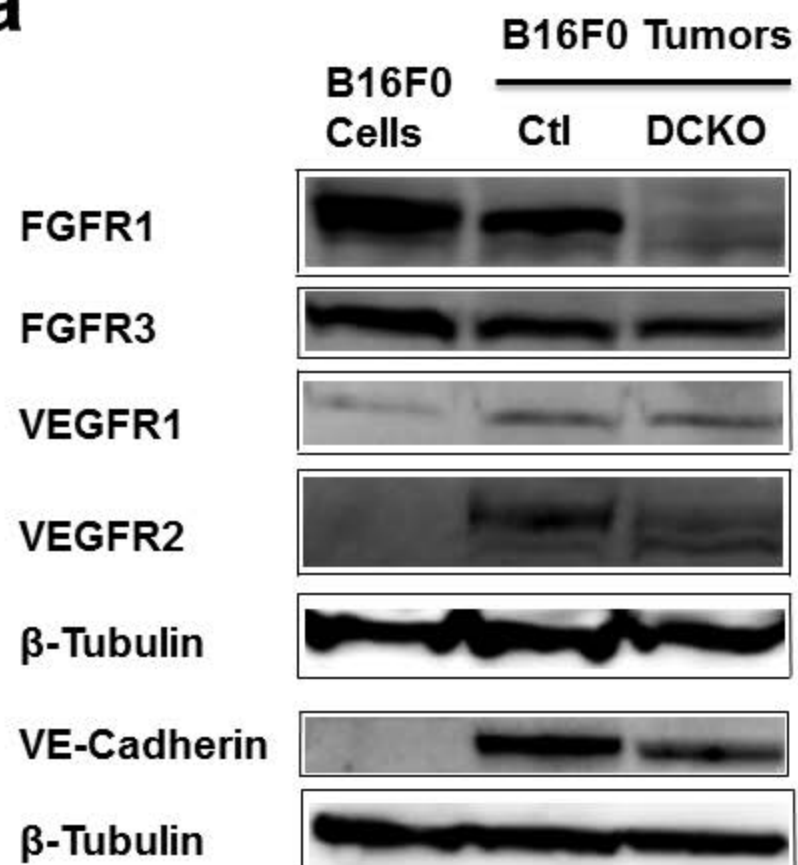

## b

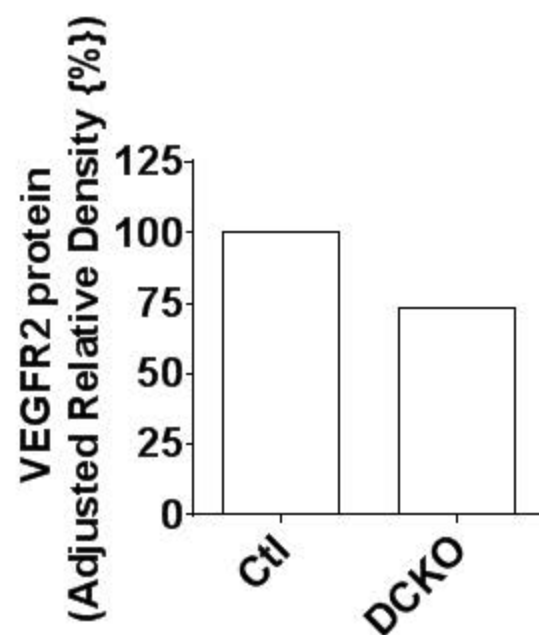

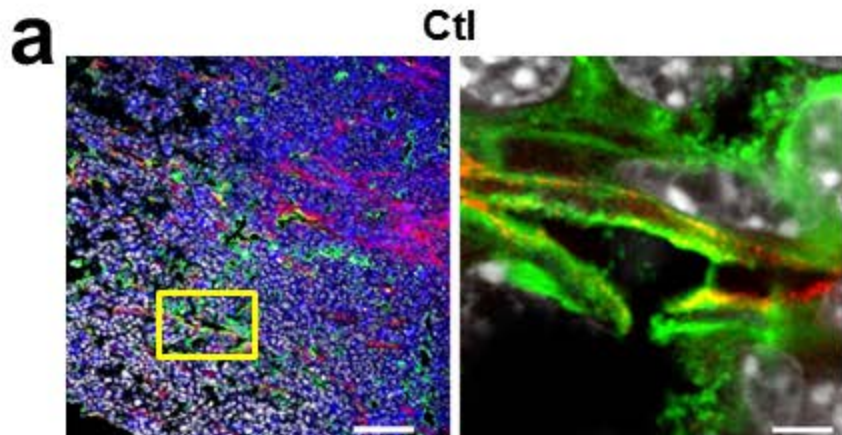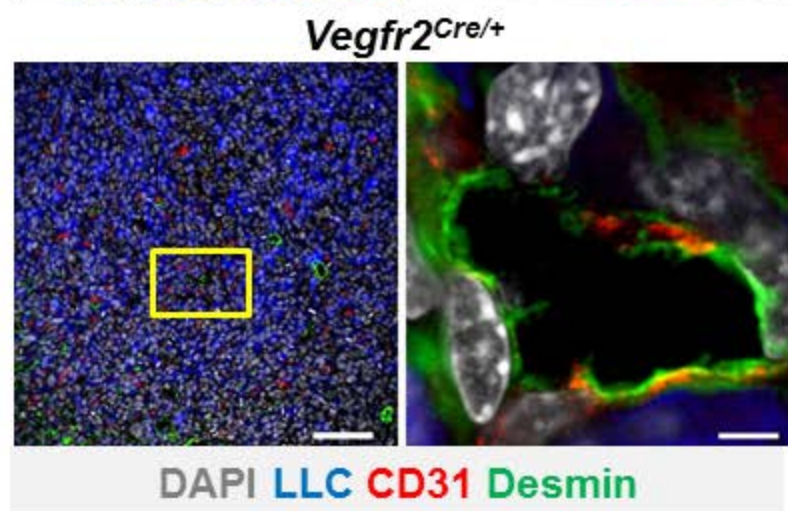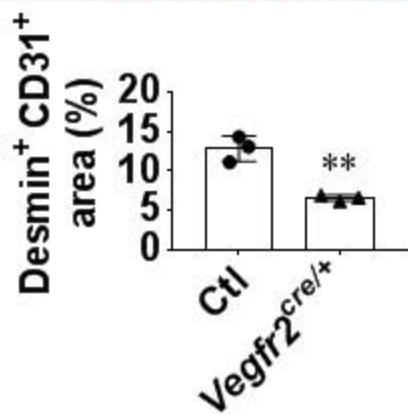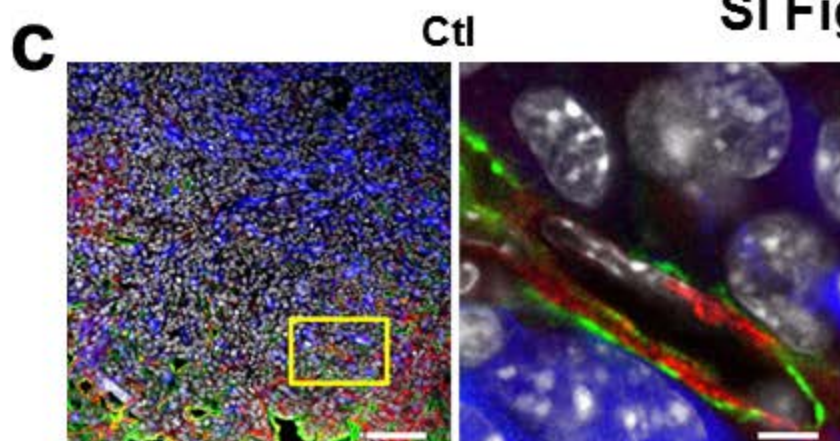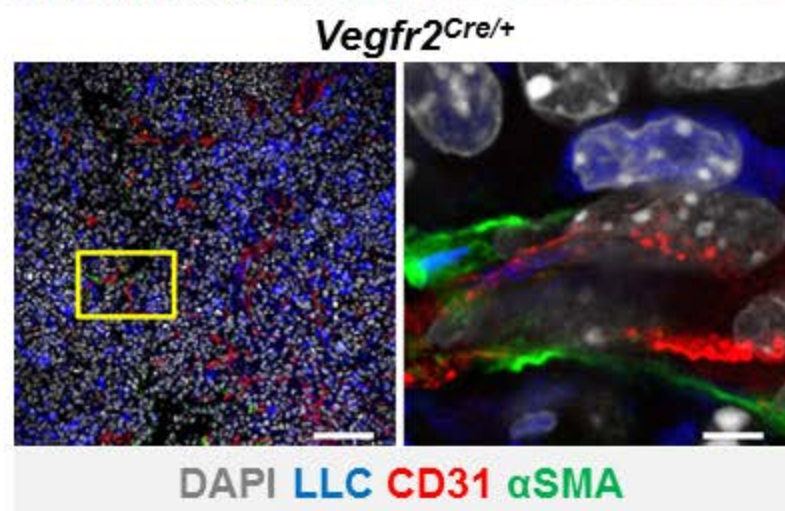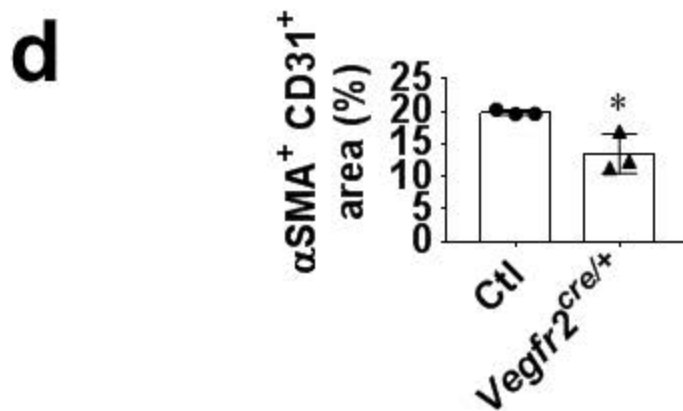

# SI Figure 4

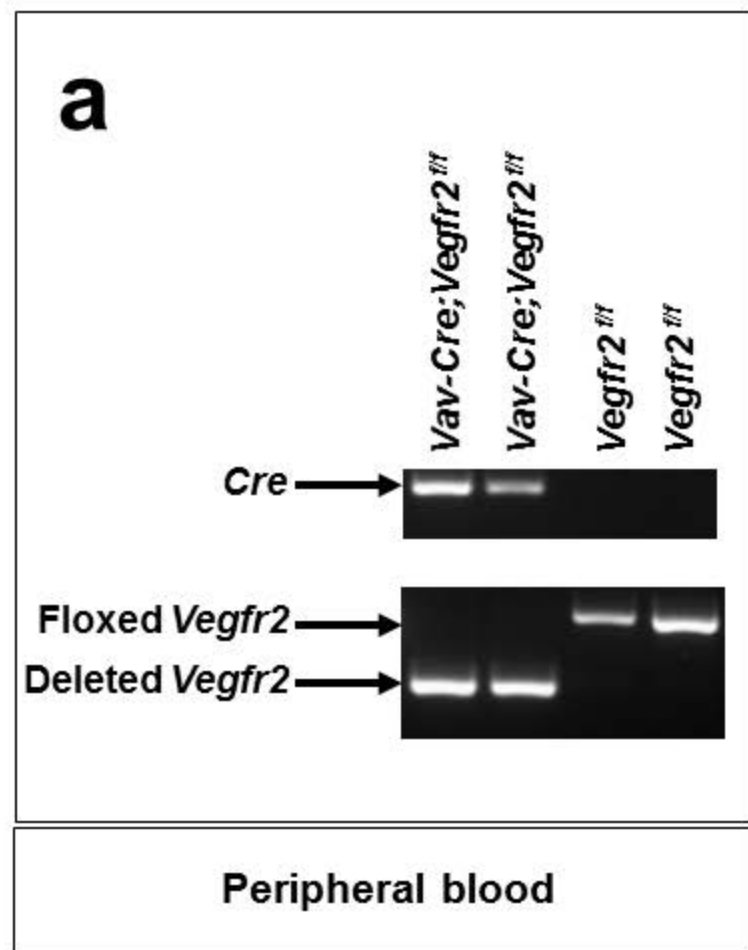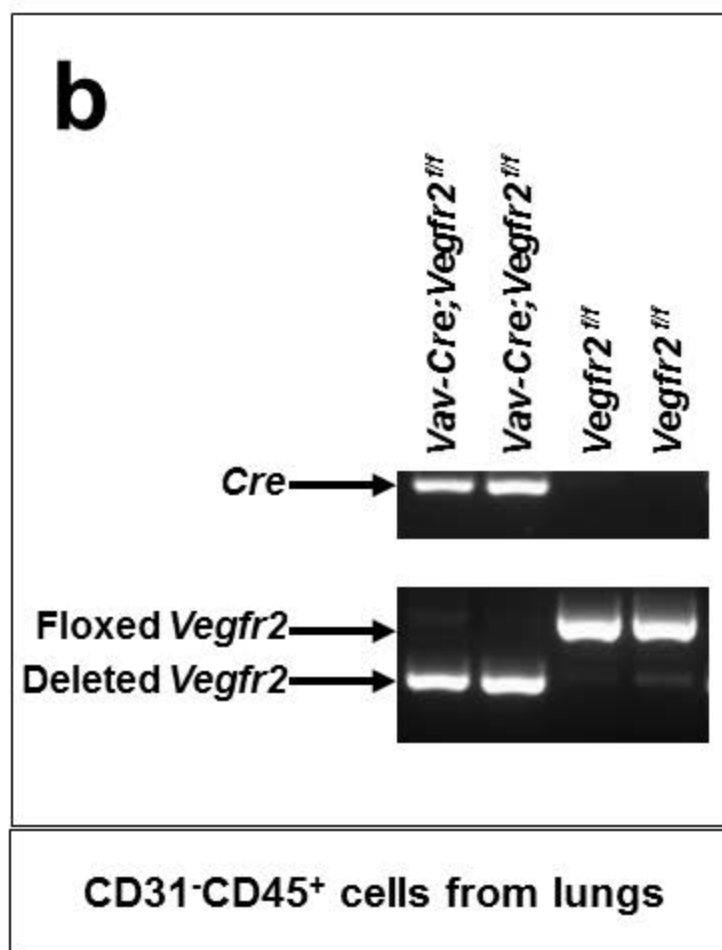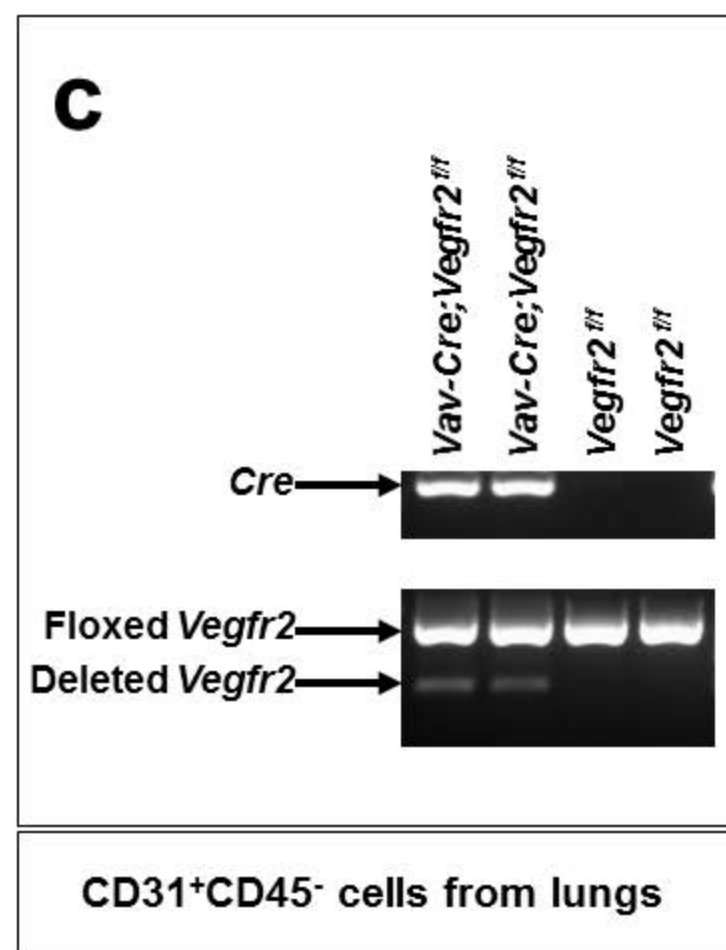



SI Figure 5

**a**

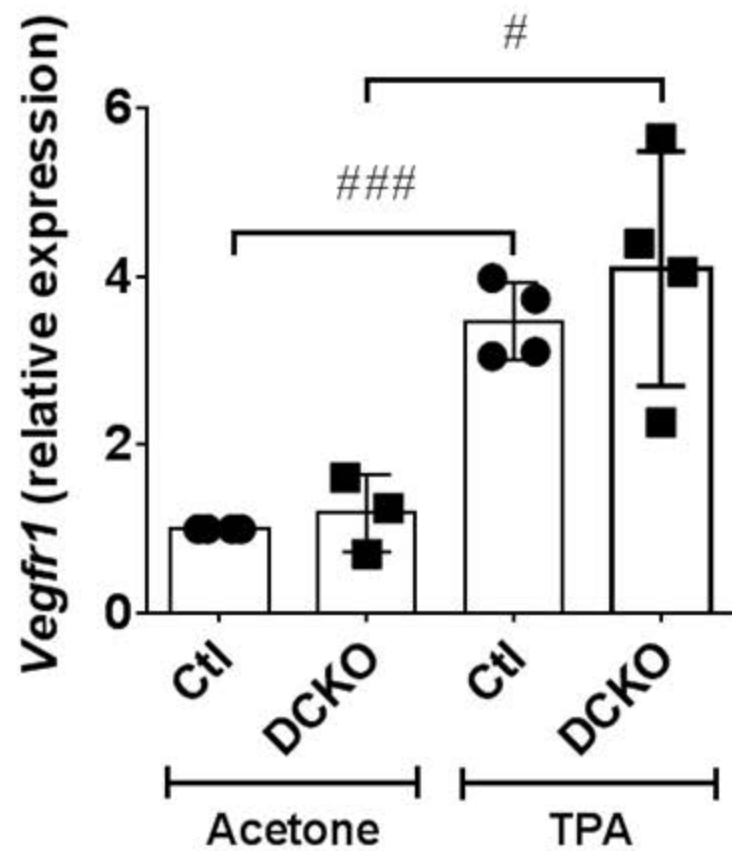

**b**

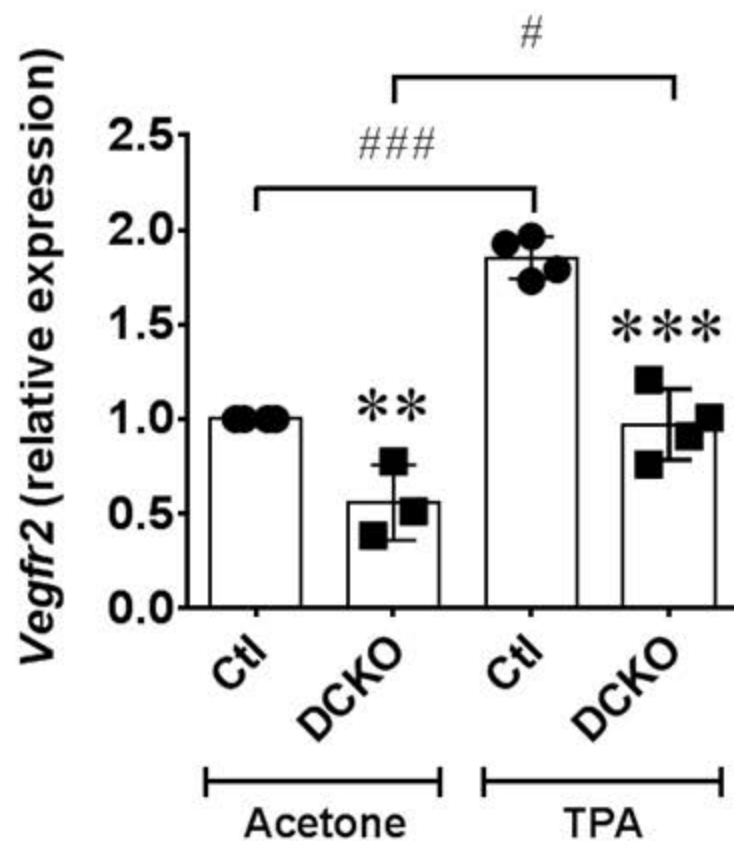

Supplement: 41598_2018_33037_MOESM1_ESM.pdf [file 41598_2018_33037_MOESM1_ESM.pdf]
